# Supplementary material
Source: publisher figshare collection journal article supplement (https://frontiersin.figshare.com/ndownloader/files/14878343)
Supplement: Supplementary file 1 [file 14878343]

Supplementary Material

# Reviewing Vietnam’s National Determine Contribution: A New Perspective Using the Marginal Cost of Abatement

Daniel Escobar Carbonari1, 2, 7*, Godefroy Grosjean2, Peter Läderach 2, Tran Dai Nghia3, Bjoern Ole Sander4, Justin McKinley 5, Leocadio Sebastian4, Jeimar Tapasco6

1Stockholm University, Department of Physical Geography, Stockholm, Sweden.

2Area of Decision and Policy Analysis, International Center for Tropical Agriculture (CIAT), CGIAR Research Program on Climate Change, Agriculture and Food Security (CCAFS), Hanoi, Vietnam

3The Institute of Policy and Strategy for Agriculture and Rural Development (IPSARD), Department of Natural Resources and Environmental Economics, Hanoi, Vietnam.

4International Rice Research Institute (IRRI), CGIAR Research Program on Climate Change, Agriculture and Food Security (CCAFS), Hanoi, Vietnam

5Monash University, Department of Economics, Clayton, Australia.

6 Area of Decision and Policy Analysis, International Center for Tropical Agriculture (CIAT), CGIAR Research Program on Climate Change, Agriculture and Food Security (CCAFS), Cali, Colombia

7Ecotonos Foundation, Cali, Colombia

*** Correspondence:**Daniel Escobar Carbonari
dscovar90@gmail.com

# Supplementary Figures and Tables

#
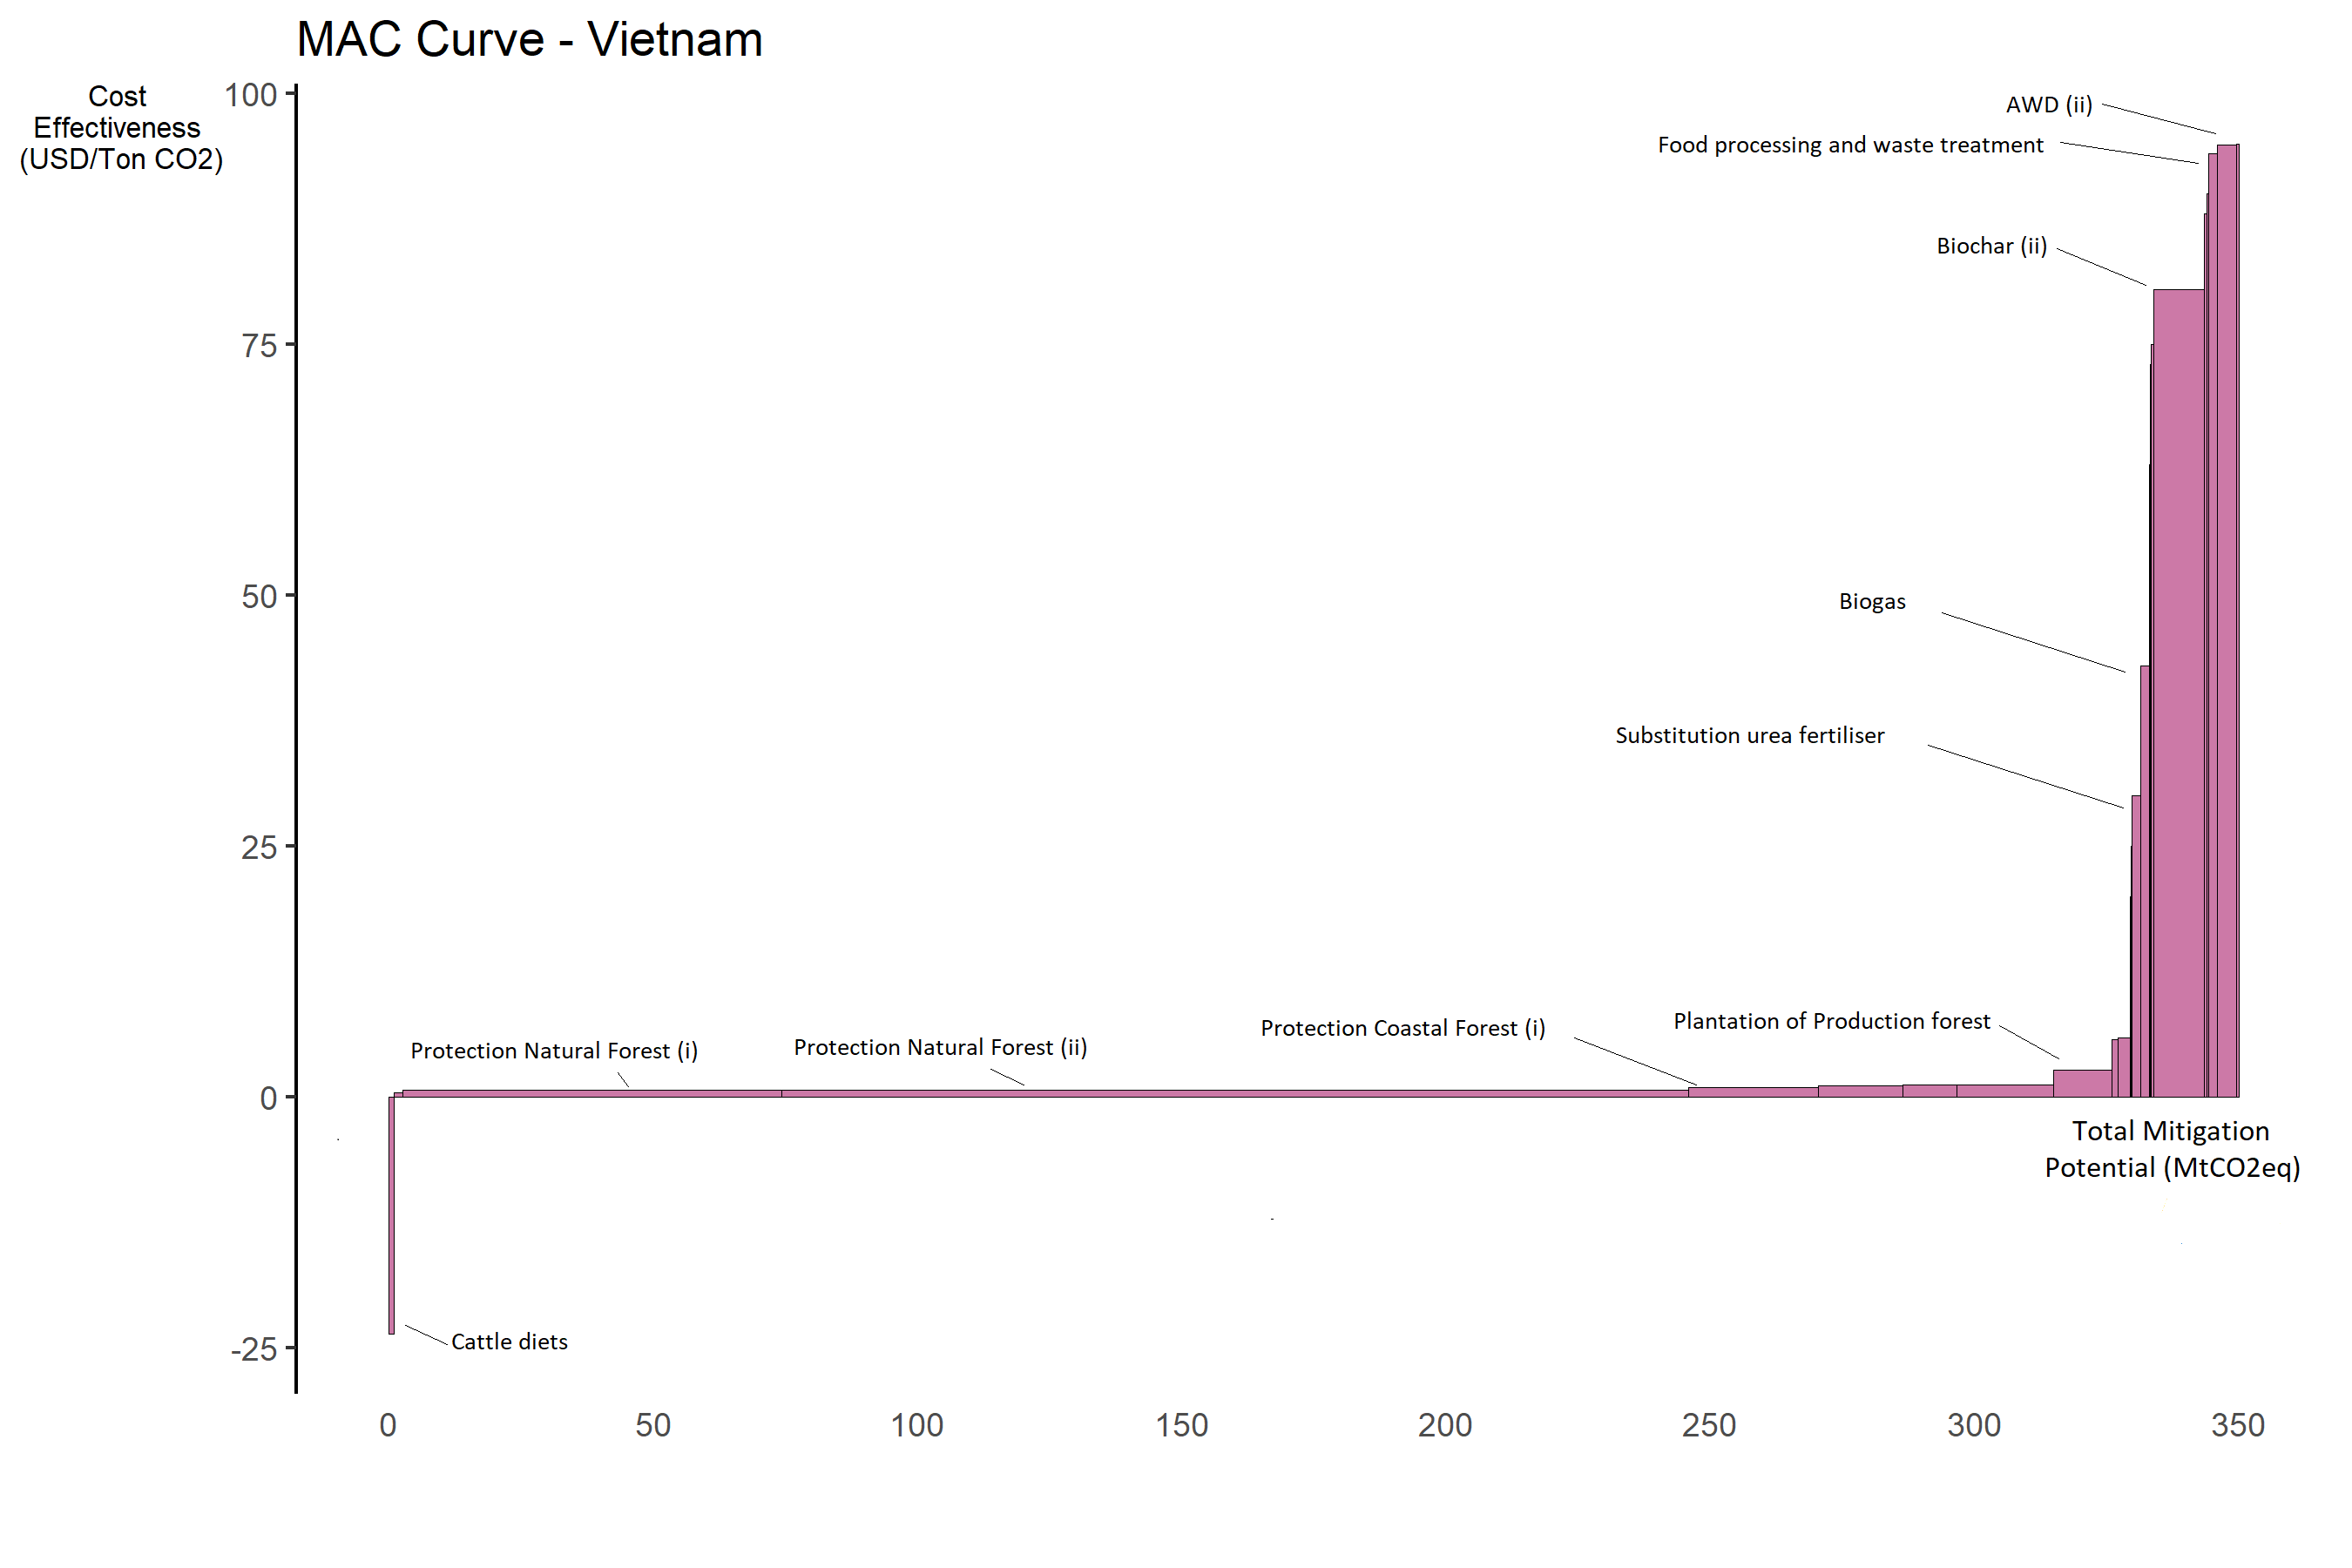


Supplementary Figure 1. Marginal abatement cost curve for the AFOLU sector based on Vietnam’s NDC technical reports (i) national goal with national effort and (ii) national goal with international support.

| Name in the MAC curve | Unit | Goal | Abatement potential (tCO2eq) | Total cost (USD) | Cost-effectiveness (USD/tCO2eq) |
| --- | --- | --- | --- | --- | --- |
| Biogas | Units | 500000 | 3170000 | 136 310 000 | 43 |
| Agricultural residues (i) | ha | 3500000 | 360000 | 22 680 000 | 63 |
| Agricultural residues (ii) | ha | 2800000 | 290000 | 21 175 800 | 73.02 |
| AWD (i) | ha | 200000 | 940000 | 82 720 000 | 88 |
| AWD (ii) | ha | 1500000 | 7020000 | 666 198 000 | 94.9 |
| Biochar (i) | ha | 200000 | 1070000 | 80 250 000 | 75 |
| Biochar (ii) | ha | 3500000 | 18800000 | 1 512 460 000 | 80.45 |
| Integrated mgmt rice | ha | 1000000 | 500000 | 10 000 000 | 20 |
| Integrated mgmt crops | ha | 1000000 | 320000 | 8 000 000 | 25 |
| Substitution urea fertilizer | ha | 2000000 | 3200000 | 96 000 000 | 30 |
| Cattle diets | head | 22000000 | 1750000 | -41 352 500 | -23.63 |
| Improve aquaculture | ha | 1000000 | 410000 | 36 900 000 | 90 |
| Improve waste aquaculture | ha | 1000000 | 1210000 | 114 950 000 | 95 |
| Food processing and waste treatment | ton | 21000000 | 3360000 | 315 840 000 | 94 |
| Irrigation in coffee production | ha | 640000 | 3390000 | 1 559 400 | 0.46 |
| Protection natural forest (i) | ha | 1000000 | 140380000 | 92 650 800 | 0.66 |
| Protection natural forest (ii) | ha | 2200000 | 336630000 | 235 641 000 | 0.7 |
| Protection coastal forest (i) | ha | 100000 | 47930000 | 45 533 500 | 0.95 |
| Protection coastal forest (ii) | ha | 30000 | 4410000 | 25 930 800 | 5.88 |
| Plantation coastal forest | ha | 10000 | 2290000 | 13 098 800 | 5.72 |
| Natural forest regeneration | ha | 200000 | 31340000 | 36 981 200 | 1.18 |
| Natural forest assisted regeneration | ha | 200000 | 20150000 | 24 180 000 | 1.2 |
| Plantation of production forest | ha | 150000 | 21590000 | 57 645 300 | 2.67 |
| Natural and production forest assisted regeneration | ha | 400000 | 35810000 | 42 972 000 | 1.2 |

Supplementary Table 1. Summary of relevant variables of the mitigations options in the MAC curve derived by Vietnams NDC technical report.

| Name in MAC curve | Adaptation co-benefit | Sources |
| --- | --- | --- |
| Acacia in bare land | Run-off control | (Douglas, 1999) |
| AWD Mekong 1 | Protection against water shortages due to precipitation extremes. | (Mohanty, Wassmann, Nelson, & Moya, 2013) |
| AWD Mekong 2 |
| AWD red river 1 |
| AWD red river 2 |
| Bamboo protection 1 | Provision of resources in case of scarcity due to high resilient biology. | (Lobovikov, Schoene, & Yping, 2012) |
| Bamboo restoration 1 |
| Bamboo restoration 2 |
| Bamboo restoration 3 |
| Bamboo restoration 4 |
| Beef Diet Supplement | Reduce risk of shortages of animal feed by diversification of the cattle diet. | (Thornton & Herrero, 2014) |
| Biogas from pigs | Not found |  |
| Coffee and avocado | Protection against climate variability, creation of microclimates to maintain coffee suitability. | (Noordwijk, et al., 2014) |
| Coffee and cassia |
| Coffee and durian |
| Compost from pigs | Not found |  |
| Dairy TMR | Reduce risk of shortages of animal feed by diversification of the cattle diet. | (Thornton & Herrero, 2014) |
| Forest protection 1 | Protection against climate variability and climate extreme events. Provision of resources in case of scarcity. Water regulation. | (Locatelli, Evans, Wardell, Andrade, & Vignola, 2011) |
| Forest restoration 1 |
| Forest restoration 2 |
| Forest restoration 3 |
| Low tillage (S & P) | Reduction of soil erosion, water regulation and nutrient retention. | (Wall & Smit, 2008), (Jeppesen, et al., 2009) |
| Maize AS | Not found |  |
| Maize compost | Reduction of soil erosion and increase water retention. | (Zougmoré, Jalloh, & Tioro, 2014) |
| Maize residues | Not found |  |
| Mangrove protection | Coastline stabilization, storm protection and provision of resources in case of scarcity. | (Alongi, 2008) |
| Mangrove restoration 1 |
| Mangrove restoration 2 |
| Rain forest protection 1 | Protection against climate variability and climate extreme events. Provision of resources in case of scarcity. Water regulation. | (Locatelli, Evans, Wardell, Andrade, & Vignola, 2011) |
| Rain forest protection 2 |
| Rain forest restoration 1 |
| Rain forest restoration 2 |
| Rain forest restoration 3 |
| Rain forest restoration 4 |
| Rice transformed acacia | Not found |  |
| Rice transformed maize | Not found |  |
| Rice transformed rubber | Not found |  |
| Rice straw | Not found |  |
| Rubber in bare land | Run-off control | (Douglas, 1999) |
| Sugarcane AS | Not found |  |
| Compost Sugarcane | Reduction of soil erosion and increase water retention. | (Zougmoré, Jalloh, & Tioro, 2014) |

Supplementary Table 2. Summary of climate change adaptation benefits of the mitigation options studied.
